# Supplementary material for: EBV+ tumors exploit tumor cell-intrinsic and -extrinsic mechanisms to produce regulatory T cell-recruiting chemokines CCL17 and CCL22
Source: PLoS Pathog. 2022 Jan 13;18(1):e1010200. doi: 10.1371/journal.ppat.1010200 (PMC8791514; doi:10.1371/journal.ppat.1010200)
Supplement: S1 Table — A mapping of tumor type short abbreviates to full names. (XLSX) [file ppat.1010200.s015.xlsx]

## Sheet: Table S1
Tumor Code Lookup Table
Tumor Code	Long Name
ACC	Adrenocortical cancer
BLCA	Bladder cancer : Urothelial carcinoma
BRCA	Breast cancer : Invasive carcinoma
CCSK	Renal cancer : Clear cell sarcoma
CESC	Cervical & Endocervical cancer
CHOL	Cholangiocarcinoma
COAD	Colon cancer : Adenocarcinoma
ESCA	Esophageal cancer
GBM	Brain cancer : Glioblastoma multiforme
GC	Gastric cancer : Adenocarcinoma : EBV-
GC_EBV	Gastric cancer : Adenocarcinoma : EBV+
HNSC	Head and Neck cancer : Squamous cell carcinoma
KICH	Renal Cancer : Chromophobe
KIRC	Renal cancer : Clear cell carcinoma
KIRP	Renal cancer : Papillary carcinoma
LGG	Brain cancer : Lower grade glioma
LIHC	Liver cancer : Hepatocellular carcinoma
LUAD	Lung cancer : Adenocarcinoma
LUSC	Lung cancer : Squamous cell carcinoma
MESO	Mesothelioma
NPC	Nasopharyngeal carcinoma
OV	Ovarian cancer : Serous cystadenocarcinoma
PAAD	Pancreatic cancer : Adenocarcinoma
PCPG	Pheochromocytoma & paraganglioma
PRAD	Prostate cancer : Adenocarcinoma
READ	Rectal cancer : Adenocarcinoma
SARC	Sarcoma
SKCM	Skin cancer : Cutaneous melanoma
TGCT	Testicular Cancer : Germ cell tumor
THCA	Thyroid cancer : Carcinoma
UCEC	Endometrial cancer : Uterine corpus endometrial carcinoma
UCS	Uterine carcinosarcoma
UVM	Skin cancer : Uveal melanoma
WT	Renal cancer : Wilms Tumor
