# Supplementary material for: EBV+ tumors exploit tumor cell-intrinsic and -extrinsic mechanisms to produce regulatory T cell-recruiting chemokines CCL17 and CCL22
Source: PLoS Pathog. 2022 Jan 13;18(1):e1010200. doi: 10.1371/journal.ppat.1010200 (PMC8791514; doi:10.1371/journal.ppat.1010200)
Supplement: S3 Table — Gene markers distinguishing the tumor cells between tumor types in the single cell RNA-Sequencing data, as identified by the “FindAllMarkers” function of the Seurat analysis package. Additional details are given at the top of the table. (XLSX) [file ppat.1010200.s017.xlsx]

## Sheet: Table S3
Significant Differential Tumor-Intrinsic Markers
The FindAllMarkers function in Seurat was used to find markers for each tumor type cluster vs all other tumors
Analysis was done on only tumor cells
FindAllMarkers was called with the following parameters: only.pos=TRUE, test.use="negbinom"
FindAllMarkers was run separately for gene markers and epitope (-CITE) markers, these results were then combined
After filtering for adjusted p-values < 0.05 and fold change > 1.25, the top 20 markers with the highest fold change were returned
Column definitions are as follows:
Marker: The identified gene or epitope (-CITE) marker
Class: The cell class within which the comparisons were made
Cluster: The cluster for which the given marker was identified
p_val: Unadjusted p-value
p_val_adj: Adjusted p-value, based on bonferroni correction using all genes in the dataset
avg_logFC: log fold-chage of the average expression between the two groups. Positive values indicate that the gene is more highly expressed in the first group
pct.1: The percentage of cells where the gene is detected in the first group
pct.2: The percentage of cells where the gene is detected in the second group
Marker	Tumor	p_val	avg_logFC	pct.1	pct.2	p_val_adj
Mgp	CT26	6.55e-39	1.04	0.396	0.179	2.12e-34
Tmsb4x	CT26	2.66e-240	0.999	0.992	0.889	8.6e-236
Mmp3	CT26	2.02e-25	0.879	0.198	0.054	6.53e-21
Snhg1	CT26	2.38e-298	0.763	0.948	0.838	7.69e-294
Dcn	CT26	7.26e-27	0.753	0.492	0.243	2.34e-22
Eno1	CT26	6.78e-253	0.743	0.988	0.948	2.19e-248
Eef1g	CT26	3.42e-295	0.715	0.995	0.986	1.1e-290
Rpl29	CT26	0	0.708	0.981	0.94	0
Gas5	CT26	0	0.706	0.991	0.98	0
Med10	CT26	5.35e-249	0.686	0.955	0.907	1.73e-244
Gm10260	CT26	2.46e-254	0.677	0.986	0.957	7.95e-250
Bnip3	CT26	5.64e-107	0.677	0.61	0.404	1.82e-102
Rpl10	CT26	0	0.665	0.999	0.998	0
Atp2b1	CT26	0	0.663	0.97	0.938	0
Esm1	CT26	1.5e-90	0.661	0.722	0.588	4.84e-86
Gm42418	CT26	4.38e-230	0.651	0.998	0.997	1.41e-225
Ubxn1	CT26	0	0.649	0.931	0.788	0
Ghr	CT26	3.81e-239	0.648	0.823	0.6	1.23e-234
Naca	CT26	0	0.642	0.998	0.996	0
Zfas1	CT26	4.84e-225	0.637	0.952	0.853	1.56e-220
Gm10076	CT26-LMP1	0	0.833	0.992	0.913	0
Rpl38	CT26-LMP1	7.87e-286	0.663	0.999	0.988	2.54e-281
2200002D01Rik	CT26-LMP1	3.99e-246	0.662	0.899	0.82	1.29e-241
Rps27	CT26-LMP1	5.76e-300	0.647	0.997	0.992	1.86e-295
Hist1h2ap	CT26-LMP1	2.76e-34	0.644	0.423	0.279	8.9e-30
Rps29	CT26-LMP1	1.07e-272	0.641	1	0.996	3.44e-268
Uba521	CT26-LMP1	4.68e-161	0.586	0.988	0.919	1.51e-156
Rps21	CT26-LMP1	2.26e-240	0.576	0.998	0.998	7.28e-236
Rpl39	CT26-LMP1	2.41e-222	0.542	0.999	0.996	7.78e-218
Atp5k	CT26-LMP1	6.93e-243	0.538	0.937	0.803	2.24e-238
Atp5md	CT26-LMP1	5.6e-212	0.497	0.971	0.915	1.81e-207
Sec61g	CT26-LMP1	1.14e-182	0.486	0.983	0.958	3.69e-178
Rps28	CT26-LMP1	2.95e-187	0.476	0.996	0.991	9.54e-183
Mrpl52	CT26-LMP1	5.79e-179	0.46	0.971	0.923	1.87e-174
Rpl37	CT26-LMP1	1.87e-150	0.445	1	0.998	6.04e-146
Rpl351	CT26-LMP1	3.94e-109	0.436	0.998	0.989	1.27e-104
Rpl37a	CT26-LMP1	5.63e-142	0.435	1	0.996	1.82e-137
Il1rl1	CT26-LMP1	3.09e-53	0.43	0.584	0.386	9.99e-49
Bola2	CT26-LMP1	2.26e-145	0.42	0.917	0.808	7.31e-141
Ccl2	CT26-LMP1	7.26e-19	0.414	0.484	0.384	2.34e-14
Cxcl1	CT26-OVA	1.19e-15	0.514	0.287	0.242	3.83e-11
Aspn	CT26-OVA	3.16e-15	0.497	0.326	0.235	1.02e-10
Spon2	CT26-OVA	1.5e-51	0.437	0.332	0.187	4.85e-47
Ogn	CT26-OVA	4.36e-23	0.399	0.521	0.439	1.41e-18
Dusp1	CT26-OVA	7.14e-21	0.361	0.431	0.383	2.3e-16
Apod	CT26-OVA	4.36e-12	0.336	0.352	0.264	1.41e-07
